# Supplementary material
Source: PubMed Central journal article supplement (PMC187840)
Supplement: pnas_100_17_9768__1.pdf [file pnas_100_17_9768__1.pdf]

**Table 1.** Intron-exon boundaries of mouse myotubularin-related protein 7 (MTMR7)

| Exon | Size, bp | Splice donor | Intron                   | Splice acceptor |
|------|----------|--------------|--------------------------|-----------------|
| 1    | >84      | ACG CCC AAG  | GTTGGTGGCC---ACGTCTCTAG  | GTT GAA AAC     |
| 2    | 123      | GAA ACC TGG  | GTATGACATC---TCTGTCCCAG  | ATT CTG CAC     |
| 3    | 163      | CGG CCA G    | GTAGGCAAAG---TCTCTTGCAG  | TG AAG TAC      |
| 4    | 158      | GAC TAC AGA  | GTGAGTGGCG---CTGGCGACAG  | GTT TGT GAC     |
| 5    | 129      | GAC AGC CAT  | GTATGTCTCA---CTCCCCGCAG  | GCC TCC ATC     |
| 6    | 135      | AGG CCT AAA  | GTAAGTGTCA---ACAACCTGCAG | CTT AAT GCG     |
| 7    | 133      | CTG GAA G    | GTAAACCATT---TTTCTTACAG  | TG TGT GAA      |
| 8    | 110      | ATT GCA AAG  | GTTTGTGAAG---GTCATTTTCAG | GCA GTT TCA     |
| 9    | 126      | GGA TTC ATG  | GTGAGTCTGG---GTATGTGTAG  | GTA TTA ATT     |
| 10   | 50       | AAT CAT AG   | GTAAGCAATA---TGTTTTATAG  | A TAT GGC       |
| 11   | 201      | GAA CTC AA   | GTAAGTCTTG---TCATTCACAG  | T GAG ATT       |
| 11 a | 88       | ACA GCA TAC  | GTGAGTAAGA---GAAATAACAG  | G ATT CAA       |
| 12   | 141      | ACC TAT AA   | GTAAGTCAGT---TCTAACTTAG  | TAA TAA TAT     |
| 12 a | 204      | TTC CTC CAG  |                          | G TTT TGG       |
| 13   | 127      | GAG GAA GAA  | GTAAGTCAGT---TCTAACTTAG  | AGG CTG GAA     |
| 14   | >816     |              |                          |                 |

Note that to clarify the intron-exon boundary of the mouse MTMR7 gene, the cDNA sequence of mouse MTMR7 and the DNA sequence of mouse muscle chromosome 8 genomic contig, strain C57BL/6J (GenBank accession no. NT\_039459), were compared. Exons 11a and 12a are consistent with insert 1 and 2, respectively. There is no intron between exons 12a and 13.
