# Supplementary material
Source: PubMed Central journal article supplement (PMC187840)
Supplement: pnas_100_17_9768__2.pdf [file pnas_100_17_9768__2.pdf]

**Table 2.** Intron-exon boundaries of human myotubularin-related protein 7 (MTMR7)

| Exon | Size, bp | Splice donor | Intron                   | Splice acceptor |
|------|----------|--------------|--------------------------|-----------------|
| 1    | >79      | ACG CCC AAG  | GTTGGTGACA---ATTTCTCTAG  | GTT GAA AAT     |
| 2    | 123      | GAA ACA TGG  | GTATGCTTTC---TTGGTTCTAG  | ATT CTT CAC     |
| 3    | 163      | AGG CCA G    | GTAGGGCAGA---TTTCTTGACAG | TG AAA TAT      |
| 4    | 158      | GAC TAC AGA  | GTGAGTGCGT---CTGGTGACAG  | GTC TGT GAC     |
| 5    | 129      | GAT AAC CAC  | GTAAGTCTCG---CTCCCCCTAG  | GCC TCC ATC     |
| 6    | 135      | CGG CCT AAA  | GTAAGTGTCA---ACCACTGCAG  | CTT AAT GCA     |
| 7    | 133      | CTG GAA G    | GTAAACCATT---TATCTTGACAG | TG TGT GAA      |
| 8    | 110      | ATT GCA AAG  | GTATGCAATT---TGTTTTCTAG  | GCA GTG TCA     |
| 9    | 126      | GGC TTC ATG  | GTGAGTGTGG---TCTTGTGTAG  | GTA TTA AAT     |
| 10   | 50       | AAT CAC CG   | GTAAGTAATA---TGTTTTATAG  | A TAT GGC       |
| 11   | 201      | GAA CTC AA   | GTAAGTGTTT---TTTATAACAG  | G ATT CAA       |
| 12   | 141      | ATG TAC AA   | GTATGTAAAT---TCCTTTCCAG  | G TTT TGG       |
| 13   | 127      | CTG GAA GAA  | GTAAGACATA---TCTTTCTTAG  | AGG CTG GAA     |
| 14   | >397     |              |                          |                 |

Note that to clarify the intron-exon boundary of the human MTMR7 gene, the cDNA sequence of human MTMR7 and the DNA sequence of Homo sapiens chromosome 8 genomic contig (GenBank accession no. NT\_030737.5) were compared.
